# Supplementary material for: The effect of Sb-surfactant on GaInP CuPtB type ordering: assessment through dark field TEM and aberration corrected HAADF imaging
Source: Royal Society of Chemistry journal article supplement (doi:10.1039/c7cp01125c), 2017-01-01
Supplement: c7cp01125c1.pdf [file c7cp01125c1.pdf]

Supporting information:

**Effect of Sb-surfactant on GaInP CuPt<sub>B</sub> type ordering: assessment through dark field TEM and aberration corrected – HAADF**

C. Coll<sup>1</sup>, E. Barrigón<sup>2</sup>, Ll. López<sup>1</sup>, L. Barrutia<sup>2</sup>, I. Rey-Stolle<sup>2</sup>, S. Estradé<sup>1</sup>, C. Algora<sup>2</sup>, F. Peiró<sup>1</sup>

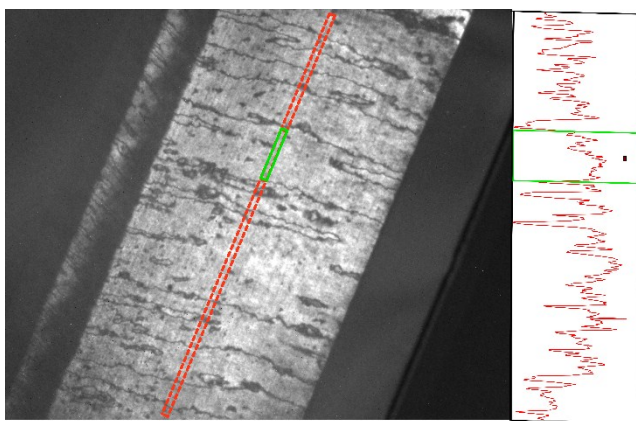

*Fig. S 1 Example of an intensity profile from a DF image used to measure the domain width at different regions of layer. Domains are enclosed by the APB (darker contrast in the DF image). The shown image corresponds to the sample C (728 ppm).*
